# Supplementary material for: Volume expansive pressure (VEP) driven non-trivial topological phase transition in LiMgBi
Source: Royal Society of Chemistry journal article supplement (doi:10.1039/c9cp06155j), 2020-01-01
Supplement: c9cp06155j1.pdf [file c9cp06155j1.pdf]

## SUPPLEMENTARY MATERIAL

# Volume Expansive Pressure (VEP) Driven Non-Trivial Topological Phase Transition In LiMgBi

Raghottam M Sattigeri<sup>1,a</sup>, Sharad Babu Pillai<sup>1,b</sup>, Prafulla K Jha<sup>1,c</sup> and Brahmananda Chakraborty<sup>2,d</sup>

<sup>1</sup>Department of Physics, Faculty of Science, The Maharaja Sayajirao University of Baroda, Vadodara.

<sup>2</sup>High Pressure and Synchrotron Radiation Physics Division, Bhabha Atomic Research Centre, Mumbai.

Corresponding Authors: <sup>a</sup>raghottam.ms@gmail.com, <sup>b</sup>sbspillai001@gmail.com, <sup>c</sup>prafullaj@yahoo.com, <sup>d</sup>brahma@barc.gov.in

### Computational Details:

To get accurate band gap we have done simulations using the density functional theory based projector augmented wave (PAW) method as implemented in the VASP code [1, 2, 3, 4]. The cut-off for the plane-wave basis expansion is taken as 500eV. To sample the Brillouin zone we have used a Monkhorst pack [5] mesh of  $6 \times 6 \times 6$  k-points. We have employed both GGA exchange correlation functional [6] and state-of-the-art hybrid functional based on the Heyd-Scuseria-Ernzerhof (HSE06) functional [7], which gives better description of electronic and magnetic properties. The convergence criterion of 0.01 eV/Å for Hellmann-Feynman forces and  $10^6$  eV for total energy were considered.

### Results

Figure 1 presents the Density of States for 4% VEP using hybrid functional. It is interesting to note that DOS at 4% VEP exhibits a semi-metal character with Dirac cone type signature having zero band gap, justifying our GGA predictions. With increasing VEP to 6.5%, we observe an opening of band gap, consistent to our GGA results. The band gap pattern is almost same for both GGA and hybrid functional calculations.

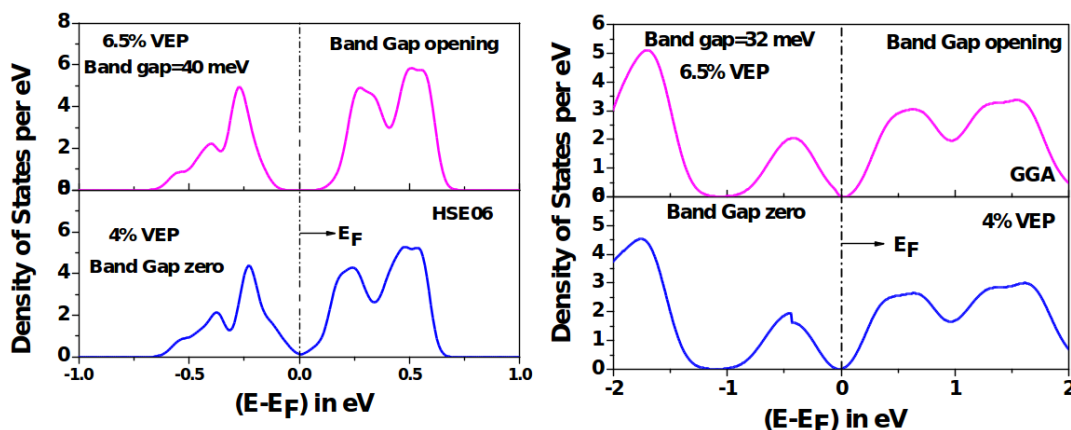

Figure 1: Density of States (DOS) under HSE06 (left) and GGA (right) at 4% VEP (lower panel) and 6.5% VEP; Fermi level is shown by black dotted line.

### References

- [1] Kresse G and Hafner J, Phys. Rev. B, **47**, 558(R) (1993)

- [2] Kresse G and Hafner J, Phys. Rev. B, **49**, 14251 (1994)
- [3] Kresse G and Furthmüller J, Comput. Mater. Sci., **6**, 15-50 (1996)
- [4] Kresse G and Furthmüller J, Phys. Rev. B, **54**, 11169 (1996)
- [5] Monkhorst J.H and Pack J. D, Phys. Rev. B, **13**, 5188 (1976)
- [6] Perdew J. P, Chevary J. A, Vosko S. H et.al., Phys. Rev. B, **46**, 6671 (1992)
- [7] Heyd J, Scuseria G.E and Ernzerhof M, J. Chem. Soc., **132**, 2876 (2010)
